# Supplementary material for: The Search of miRNA Related to Invasive Growth of Nonfunctioning Gonadotropic Pituitary Tumors
Source: Hindawi journal article supplement (doi:10.1155/2020/3730657), 2020-12-05

**Supplementary Figure 1.** Validation of selected small RNA molecules as the reference for normalization of qRT-PCR data for the assessments of miRNA level in gondotroph pituitary neuroendocrine tumors

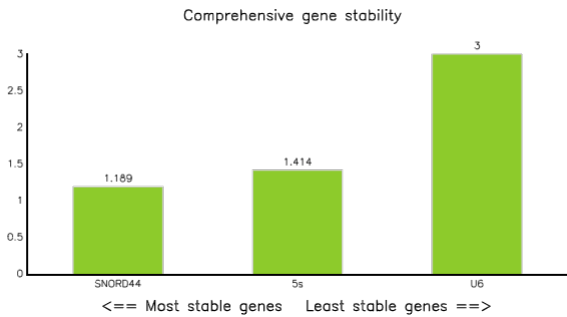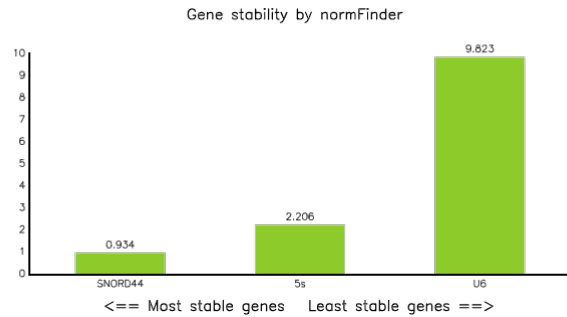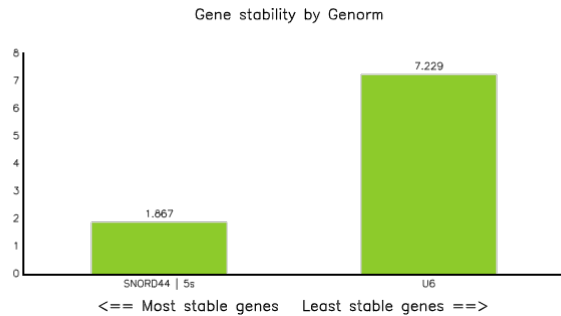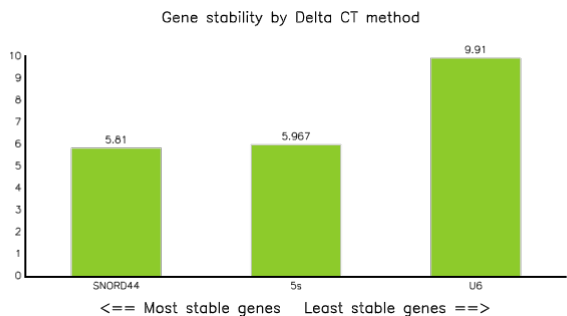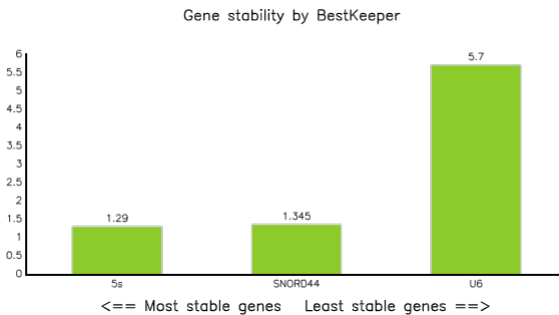

Supplement: f1 [file 3730657.f1.zip]
