# Supplementary material for: The Search of miRNA Related to Invasive Growth of Nonfunctioning Gonadotropic Pituitary Tumors
Source: Int J Endocrinol. 2020 Dec 5;2020:3730657. doi: 10.1155/2020/3730657 (PMC7737439; doi:10.1155/2020/3730657)
Supplement: Supplementary Materials — Table S1: patient characteristics in detail. Table S2: the results of comparison of miRNA expression in invasive and noninvasive gondotropic PitNETs. Figure S1: validation of selected small RNA molecules as the reference for normalization for QRT–PCR data for assessment of miRNA level in gondotroph pituitary neuroendocrine tumors. [file 3730657.f1.zip]

Archive with 4 entries (4 files):
- 3730657.f1/~$pplementary description - 3730657.docx
- 3730657.f1/rev_Supplementary_Tables.xlsx
- 3730657.f1/Supplementary description - 3730657.docx
- 3730657.f1/Supplementary_Figure1.pdf
