# Supplementary material for: The Search of miRNA Related to Invasive Growth of Nonfunctioning Gonadotropic Pituitary Tumors
Source: Int J Endocrinol. 2020 Dec 5;2020:3730657. doi: 10.1155/2020/3730657 (PMC7737439; doi:10.1155/2020/3730657)
Supplement: Supplementary Materials — Table S1: patient characteristics in detail. Table S2: the results of comparison of miRNA expression in invasive and noninvasive gondotropic PitNETs. Figure S1: validation of selected small RNA molecules as the reference for normalization for QRT–PCR data for assessment of miRNA level in gondotroph pituitary neuroendocrine tumors. [file 3730657.f1.zip › 3730657.f1/rev_Supplementary_Tables.xlsx]

## Sheet: Table S1
Table S1. Patient characteristics in details.
Discovery group
nr	code	sex	age (years)	subtype	invasive	GH	PRL	ACTH	TSH	FSH	LH	α-su
1	26/10	M	38	gonadotroph adenoma	-	-	-	-	-	-	+	-
2	37/10	M	61	gonadotroph adenoma	-	-	-	-	-	-	+	-
3	35/11	M	55	gonadotroph adenoma	-	-	-	-	-	+	+	+
4	37/12	M	68	gonadotroph adenoma	-	-	-	-	-	+	+	+
5	46/12	M	36	gonadotroph adenoma	+	-	-	-	-	+	+	-
6	1/13	M	60	gonadotroph adenoma with oncocytic features	-	-	-	-	-	+	+	-
7	5/13	M	73	gonadotroph adenoma with oncocytic features	+	-	-	-	-	+	+	+
8	9/13	M	59	gonadotroph adenoma	+	-	-	-	-	-	+	-
9	15/13	M	44	gonadotroph adenoma	-	-	-	-	-	+	+	+
10	1/14	M	68	gonadotroph adenoma	+	-	-	-	-	+	+	-
11	10/14	F	56	gonadotroph adenoma	-	-	-	-	-	+	+	+
12	16/14	F	54	gonadotroph adenoma	-	-	-	-	-	-	+	+
13	24/14	M	57	gonadotroph adenoma	-	-	-	-	-	-	+	-
14	44/14	F	59	gonadotroph adenoma	+	-	-	-	-	+	-	-
15	55/14	M	50	gonadotroph adenoma with oncocytic features	-	-	-	-	-	+	+	-
16	51/10	M	58	gonadotroph adenoma	+	-	-	-	-	+	+	-
17	80/11	M	55	gonadotroph adenoma	+	-	-	-	-	+	+	+
18	14/12	M	61	gonadotroph adenoma	+	-	-	-	-	+	+	+
19	38/12	M	60	gonadotroph adenoma	-	-	-	-	-	+	+	-
20	50/12	M	53	gonadotroph adenoma	+	-	-	-	-	+	+	-
Validation group
1	31/11	M	75	gonadotroph adenoma	+	-	-	-	-	+	+	-
2	33/11	M	67	gonadotroph adenoma	+	-	-	-	-	+	+	+
3	49/12	F	49	gonadotroph adenoma	+	-	-	-	-	+	+	+
4	2/13	M	61	gonadotroph adenoma	+	-	-	-	-	+	+	-
5	8/13	M	73	gonadotroph adenoma	+	-	-	-	-	-	+	+
6	5/14	F	58	gonadotroph adenoma/null cell adenoma*	+	-	-	-	-	-	-	-
7	6/14	M	63	gonadotroph adenoma	-	-	-	-	-	-	+	-
8	8/14	M	34	gonadotroph adenoma	-	-	-	-	-	-	+	-
9	9/14	M	80	gonadotroph adenoma	+	-	-	-	-	-	+	+
10	11/14	F	40	gonadotroph adenoma	+	-	-	-	-	+	+	+
11	15/14	F	57	gonadotroph adenoma	-	-	-	-	-	-	-	+
12	18/14	F	75	gonadotroph adenoma with oncocytic features	-	-	-	-	-	+	+	-
13	20/14	M	57	gonadotroph adenoma with oncocytic features	+	-	-	-	-	-	+	-
14	22/14	M	58	gonadotroph adenoma with oncocytic features	+	-	-	-	-	+	+	+
15	47/14	F	50	gonadotroph adenoma	+	-	-	-	-	+	+	+
16	52/14	F	57	gonadotroph adenoma	-	-	-	-	-	+	-	-
17	2/15	M	52	gonadotroph adenoma	-	-	-	-	-	-	+	-
18	3/15	F	65	gonadotroph adenoma with oncocytic features	+	-	-	-	-	+	+	-
19	7/15	F	58	gonadotroph adenoma with oncocytic features	+	-	-	-	-	+	+	-
20	9/15	M	71	gonadotroph adenoma	+	-	-	-	-	+	+	+
21	21/15	F	52	gonadotroph adenoma/null cell adenoma*	+	-	-	-	-	-	-	-
22	22/15	F	54	gonadotroph adenoma	-	-	-	-	-	+	+	+
23	23/15	F	75	gonadotroph adenoma	+	-	-	-	-	+	+	+
24	33/15	M	74	gonadotroph adenoma	+	-	-	-	-	+	+	+
25	48/15	M	77	gonadotroph adenoma	+	-	-	-	-	+	+	+
26	52/15	M	56	gonadotroph adenoma	+	-	-	-	-	+	+	+
27	55/15	F	58	gonadotroph adenoma	-	-	-	-	-	+	+	+
28	57/15	F	67	gonadotroph adenoma	+	-	-	-	-	+	+	+
29	58/15	M	37	gonadotroph adenoma with oncocytic features	+	-	-	-	-	-	+	+
30	60/15	F	79	gonadotroph adenoma with oncocytic features	+	-	-	-	-	-	+	-
31	61/15	M	72	gonadotroph adenoma with oncocytic features	+	-	-	-	-	-	+	-
32	63/15	M	70	gonadotroph adenoma with oncocytic features	+	-	-	-	-	-	+	+
33	65/15	F	60	gonadotroph adenoma with oncocytic features	+	-	-	-	-	-	-	+
34	66/15	M	65	gonadotroph adenoma	-	-	-	-	-	-	+	+
35	69/15	M	67	gonadotroph adenoma with oncocytic features	-	-	-	-	-	-	+	+
36	73/15	M	71	gonadotroph adenoma	+	-	-	-	-	+	+	-
37	74/15	M	54	gonadotroph adenoma with oncocytic features	-	-	-	-	-	+	+	+
38	75/15	F	53	gonadotroph adenoma	+	-	-	-	-	+	+	-
39	78/15	F	76	gonadotroph adenoma	+	-	-	-	-	-	+	+
40	80/15	M	76	gonadotroph adenoma	-	-	-	-	-	+	-	+
41	82/15	F	71	gonadotroph adenoma	-	-	-	-	-	+	-	+
42	86/15	M	63	gonadotroph adenoma	+	-	-	-	-	-	-	+
43	14/16	F	70	gonadotroph adenoma with oncocytic features	-	-	-	-	-	+	+	+
44	17/16	M	70	gonadotroph adenoma	+	-	-	-	-	+	+	+
45	22/16	M	43	gonadotroph adenoma	-	-	-	-	-	+	+	+
46	27/16	F	46	gonadotroph adenoma	+	-	-	-	-	-	-	+
47	29/16	F	60	gonadotroph adenoma/null cell adenoma*	+	-	-	-	-	-	-	-
48	33/16	F	55	gonadotroph adenoma	-	-	-	-	-	-	+	+
49	35/16	F	63	gonadotroph adenoma	+	-	-	-	-	+	+	+
50	41/16	M	69	gonadotroph adenoma	-	-	-	-	-	+	+	-
51	42/16	F	65	gonadotroph adenoma	+	-	-	-	-	+	+	+
52	43/16	F	58	gonadotroph adenoma	+	-	-	-	-	+	+	+
53	44/16	F	78	gonadotroph adenoma	+	-	-	-	-	+	+	+
54	46/16	F	66	gonadotroph adenoma	+	-	-	-	-	+	+	+
55	50/16	F	71	gonadotroph adenoma	-	-	-	-	-	+	+	+
56	53/16	M	65	gonadotroph adenoma	-	-	-	-	-	-	+	+
57	55/16	M	65	gonadotroph adenoma with oncocytic features	+	-	-	-	-	+	+	+
58	56/16	M	62	gonadotroph adenoma with oncocytic features	-	-	-	-	-	-	+	+
59	59/16	M	66	gonadotroph adenoma	-	-	-	-	-	+	+	+
60	60/16	F	58	gonadotroph adenoma	-	-	-	-	-	+	+	+
61	61/16	M	51	gonadotroph adenoma/null cell adenoma*	+	-	-	-	-	-	-	-
62	68_15	F	59	gonadotroph adenoma	-	-	-	-	-	+	+	+
63	19_16	M	47	gonadotroph adenoma with oncocytic features	-	-	-	-	-	+	-	-
64	28_16	M	68	gonadotroph adenoma	-	-	-	-	-	+	+	+
65	49_15	M	44	gonadotroph adenoma/null cell adenoma*	-	-	-	-	-	-	-	-
66	47_15	M	77	gonadotroph adenoma	-	-	-	-	-	+	+	+
67	38_10	M	52	gonadotroph adenoma	+	-	-	-	-	+	+	-
68	10_13	F	43	gonadotroph adenoma	+	-	-	-	-	-	+	+
69	40_14	M	46	gonadotroph adenoma	+	-	-	-	-	-	+	+
70	37_14	F	75	gonadotroph adenoma	+	-	-	-	-	-	+	+
71	45_14	M	62	gonadotroph adenoma	+	-	-	-	-	-	+	+
72	57_14	M	79	gonadotroph adenoma	+	-	-	-	-	+	+	+
73	17_14	M	72	gonadotroph adenoma	-	-	-	-	-	+	+	+
74	25_14	M	48	gonadotroph adenoma	-	-	-	-	-	+	+	-
75	32_16	K	50	gonadotroph adenoma	-	-	-	-	-	+	+	+
76	35/15	M	69	gonadotroph adenoma	+	-	-	-	-	-	-	+
77	1/16	M	64	gonadotroph adenoma	+	-	-	-	-	-	+	+
78	12/16	M	73	gonadotroph adenoma with oncocytic features	-	-	-	-	-	+	+	-
79	20/16	F	69	gonadotroph adenoma with oncocytic features	-	-	-	-	-	+	+	+
80	21/16	F	59	gonadotroph adenoma	-	-	-	-	-	+	+	+
				* null cell adenomas with ultrastrucural gonadotroph features

## Sheet: Table S2
Table S2. The results of comparison of miRNA expression in invasive and noninvasive gondotropic PitNETs.
			Differential analysis		ROC curve analysis
No	miRNA	baseMean	FC	p_value	AUC	p-value
1	hsa-miR-184	192.373	3.64244	0.00135973	0,8384*	0.01095
2	hsa-miR-181a-2-3p	36.8908	1.69034	0.00554122	0,7879*	0.03042
3	hsa-miR-93-3p	64.7668	0.732221	0.00649635	0,8485*	0.008791
4	hsa-miR-513b-5p	16.2697	5.63756	0.00673606	0.6667	0.2101
5	hsa-miR-574-5p	41.4306	1.85314	0.00725077	0,7879*	0.03042
6	hsa-miR-505-3p	189.905	0.612508	0.00770817	0.7374	0.07426
7	hsa-miR-190a-3p	15.1143	2.01234	0.00779198	0.6061	0.4251
8	hsa-miR-149-5p	1819	0.450866	0.0110709	0.697	0.1385
9	hsa-miR-185-5p	2550.88	1.30082	0.0130979	0,7778*	0.03673
10	hsa-miR-3200-5p	14.5698	0.659749	0.0132772	0,8182*	0.01674
11	hsa-miR-873-5p	17.2261	0.126705	0.0209662	0.7614	0.0576
12	hsa-miR-514b-5p	47.3451	4.11297	0.0220288	0.5909	0.4942
13	hsa-miR-382-3p	7.04433	0.314804	0.0221216	0.5758	0.5688
14	hsa-miR-510-5p	11.5653	4.3529	0.0250437	0.5859	0.5185
15	hsa-miR-501-3p	40.8861	1.5151	0.0255635	0.7576	0.05276
16	hsa-miR-127-5p	9.42859	0.295715	0.0262537	0.5758	0.5688
17	hsa-miR-409-3p	26.221	0.41375	0.0299917	0.5556	0.6761
18	hsa-miR-144-5p	368.84	2.29875	0.0339089	0.5051	0.9697
19	hsa-miR-628-5p	232.366	0.745637	0.0351739	0.7576	0.05276
20	hsa-miR-506-3p	37.1876	3.87065	0.0368437	0.5758	0.5688
21	hsa-miR-1277-5p	29.3824	1.74652	0.0378906	0.7172	0.1024
22	hsa-miR-500a-3p	68.0604	1.53427	0.0384843	0.7374	0.07426
23	hsa-miR-362-3p	173.163	1.65466	0.0403388	0.5859	0.5185
24	hsa-miR-3065-5p	31.0154	0.496337	0.0416941	0.5354	0.7903
25	hsa-miR-452-5p	9.77856	0.555448	0.0467888	0.6768	0.1837
26	hsa-miR-142-5p	62.066	2.25575	0.0475533	0.5253	0.8494
27	hsa-miR-758-3p	6.76374	0.29226	0.0486722	0.5253	0.8494
28	hsa-miR-130b-3p	30.7618	0.720646	0.0491142	0.7475	0.06275
29	hsa-miR-181b-5p	70.8365	1.40174	0.0498266	0.697	0.1385
	* selected for qPCR-based validation based on ROC curve analysis
